# Supplementary material for: Randomized Trial of Critical Time Intervention to Prevent Homelessness After Hospital Discharge
Source: Atypon-hosted journal article supplement (doi:10.1176/ps.62.7.pss6207_0713), 2011-07-01
Supplement: Herman_ds.pdf [file Herman_ds.pdf]

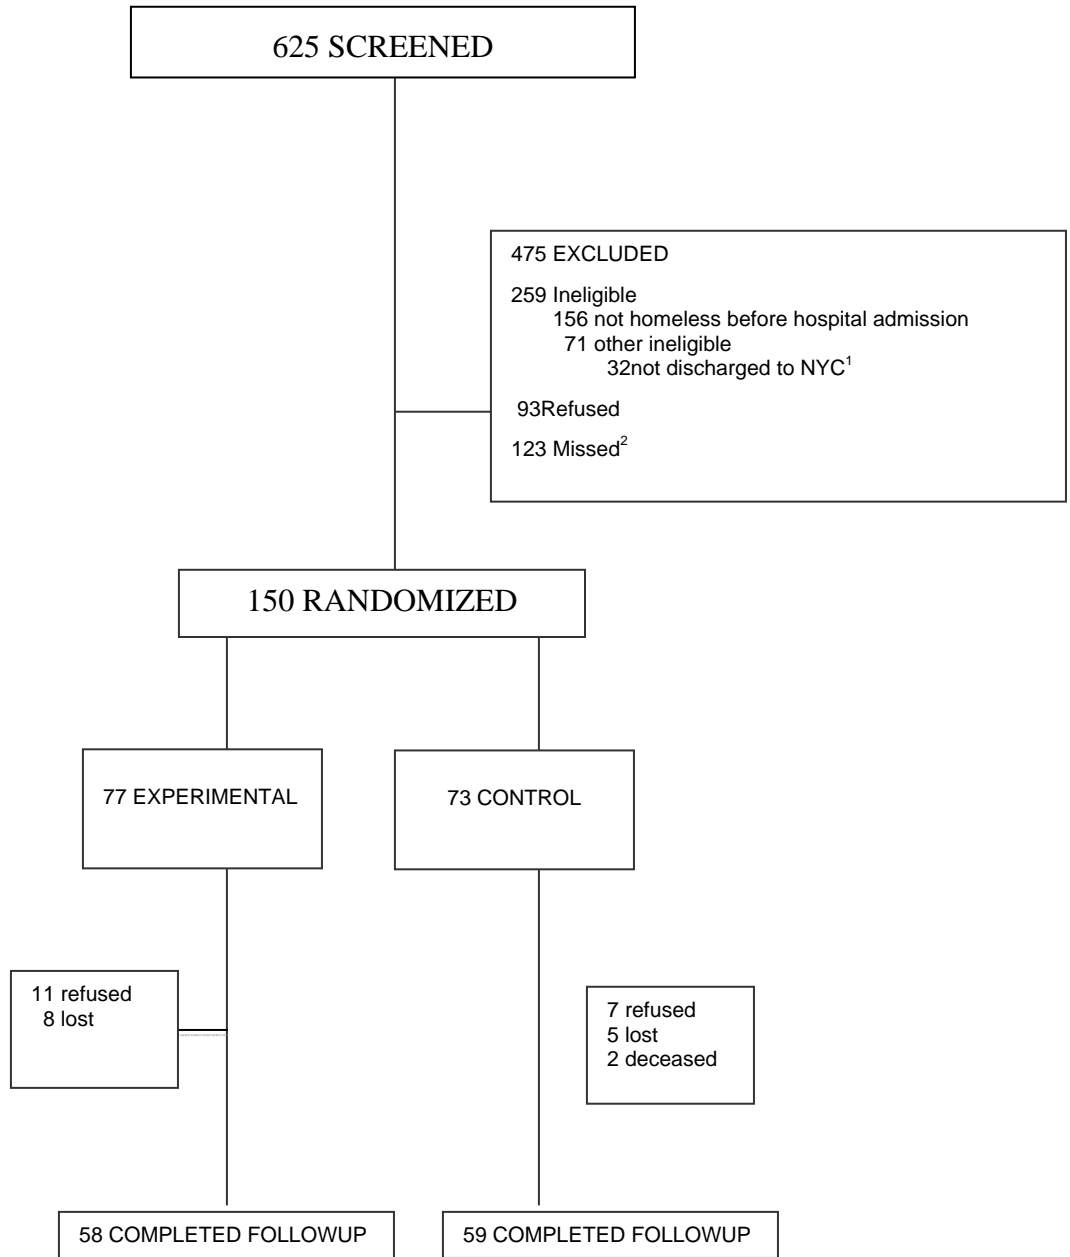

<sup>1</sup>Individuals who were dropped from the study after randomization because they were not discharged to a location within New York City during the study period

<sup>2</sup>Individuals whom we were unable to locate for screening
